# Supplementary material for: How socioeconomic status moderates the stunting-age relationship in low-income and middle-income countries
Source: PubMed Central journal article supplement — BMJ Glob Health. 2019 Feb 8;4(1):e001175. doi: 10.1136/bmjgh-2018-001175 (PMC6407538; doi:10.1136/bmjgh-2018-001175), 2019-02-08
Supplement: bmjgh-2018-001175supp001.pdf [file bmjgh-2018-001175supp001.pdf]

# How socioeconomic status moderates the stunting-age relationship in low-income and middle-income countries

*supplementary appendix*

## Table of contents

|                                                                                                    |    |
|----------------------------------------------------------------------------------------------------|----|
| Table S1: List of indicators and coding                                                            | 2  |
| Table S2: Survey details                                                                           | 3  |
| Table S3: Prevalence of stunting and severe stunting as percentage by age and SES                  | 4  |
| Figure S1: Prevalence of stunting and severe stunting as percentage – using population weights     | 5  |
| Figure S2: Deviation of stunting rates from analysis sample (no estimated age)                     | 6  |
| Figure S3: Deviation of stunting rates from analysis sample (5%-cutoff for asset index)            | 7  |
| Figure S4: Prevalence of severe stunting by country income group                                   | 8  |
| Figure S5: Prevalence of stunting by age group and household SES – Latin America and the Caribbean | 9  |
| Figure S6: Prevalence of stunting by age group and household SES – Middle East and North Africa    | 10 |
| Figure S7: Prevalence of stunting by age group and household SES – Sub Saharan Africa              | 11 |
| Figure S8: Prevalence of stunting by age group and household SES – South Asia                      | 12 |
| Figure S9: Prevalence of stunting by age group and household SES – Europe and Central Asia         | 13 |
| Figure S10: Prevalence of stunting by age group and household SES – East Asia and Pacific          | 14 |
| Table S4: Cross-tabulation of household SES quartiles and maternal education categories            | 15 |

Table S1: List of indicators and coding

| <b>Nutrition-specific</b>                                            | <b>Coding</b>                                                                                                                                                                                                                                                                             |
|----------------------------------------------------------------------|-------------------------------------------------------------------------------------------------------------------------------------------------------------------------------------------------------------------------------------------------------------------------------------------|
| Early initiation of breastfeeding                                    | <i>Binary indicator equal to 1 if child was breastfed either immediately or no later than 1 hour after birth. Set to missing for all children with unknown timing of breastfeeding.</i>                                                                                                   |
| Vitamin A supplements                                                | <i>Binary indicator equal to 1 if vitamin A supplementation was reported by mother and/or is indicated on vaccination card (with or without date). Set to missing if unknown.</i>                                                                                                         |
| Iron supplements                                                     | <i>Binary indicator equal to 1 if child took iron supplements within seven days before interview. Set to missing if unknown.</i>                                                                                                                                                          |
| Drugs against intestinal parasites                                   | <i>Binary indicator equal to 1 if child received drugs against intestinal parasites within six months before interview. Set to missing if unknown.</i>                                                                                                                                    |
| Bacillus Calmette–Guérin (BCG) vaccination and first DPT vaccination | <i>Binary indicator equal to 1 if both BCG and first DPT vaccination were reported by mother and/or are indicated on vaccination card (with or without date). Set to missing if one of them or both are unknown.</i>                                                                      |
| Safe stool disposal                                                  | <i>Binary indicator equal to 1 if stool of last born child is disposed in one of the following ways: child uses toilet or latrine; stool is put/rinsed into toilet or latrine; stool is buried. Category “other” set to missing.</i>                                                      |
| Non-solid fuel                                                       | <i>Binary indicator equal to 1 if household uses non-solid fuels (i.e. electricity; LPG; gas or kerosene).</i>                                                                                                                                                                            |
| <b>Nutrition-sensitive</b>                                           | <b>Coding</b>                                                                                                                                                                                                                                                                             |
| High-quality water source                                            | <i>Binary indicator equal to 1 if drinking water is piped into dwelling or yard/plot. Category “other” set to missing.</i>                                                                                                                                                                |
| Adequate sanitation                                                  | <i>Binary indicator equal to 1 if water is flushed to sewer system. Category “other” set to missing. In Peru, category definitions differed. After consulting final report, every household with access to toilet in- or outside dwelling was considered to have adequate sanitation.</i> |
| Delivery in health facility                                          | <i>Binary indicator equal to 1 if child was delivered in a health facility (as opposed to at home). Category “other” set to missing.</i>                                                                                                                                                  |
| Maternal education                                                   | <i>Maternal education in six categories: “no education”; “incomplete primary”; “complete primary”; “incomplete secondary”; “complete secondary”; “higher”.</i>                                                                                                                            |

Table S2: Survey details

| Country                   | DHS code | Observations | Start of survey | Number of assets available |
|---------------------------|----------|--------------|-----------------|----------------------------|
| Albania                   | ALBR50   | 1424         | 2008            | 10                         |
| Angola                    | AOBR71   | 6270         | 2015            | 11                         |
| Armenia                   | AMBR61   | 1329         | 2010            | 10                         |
| Azerbaijan                | AZBR52   | 1895         | 2006            | 10                         |
| Bangladesh                | BDBR72   | 6427         | 2014            | 11                         |
| Benin                     | BJBR61   | 10041        | 2011            | 11                         |
| Bolivia                   | BOBR51   | 7430         | 2008            | 11                         |
| Brazil                    | BRBR31   | 4051         | 1996            | 8                          |
| Burkina Faso              | BFBR62   | 6548         | 2010            | 11                         |
| Burundi                   | BUBR61   | 3386         | 2010            | 10                         |
| Cambodia                  | KHBR73   | 4282         | 2014            | 11                         |
| Cameroon                  | CMBR61   | 4821         | 2011            | 11                         |
| Central African Republic* | CFBR31   | 2334         | 1994            | 10                         |
| Chad                      | TDBR71   | 9950         | 2014            | 10                         |
| Colombia                  | COBR61   | 15885        | 2009            | 10                         |
| Comoros                   | KMBR61   | 2470         | 2012            | 11                         |
| Congo                     | CGBR51   | 3742         | 2005            | 11                         |
| Congo Democratic Republic | CDBR61   | 7902         | 2013            | 11                         |
| Cote d'Ivoire             | CIBR62   | 3160         | 2011            | 10                         |
| Dominican Republic        | DRBR61   | 3072         | 2013            | 9                          |
| Egypt                     | EGBR61   | 13757        | 2014            | 9                          |
| Ethiopia                  | ETBR70   | 8631         | 2008            | 11                         |
| Gabon                     | GABR60   | 3300         | 2012            | 11                         |
| Gambia                    | GMBR60   | 3105         | 2013            | 11                         |
| Ghana                     | GHBR72   | 2643         | 2014            | 11                         |
| Guatemala                 | GUBR71   | 11496        | 2014            | 11                         |
| Guinea                    | GNBR62   | 3117         | 2012            | 11                         |
| Guyana                    | GYBR51   | 1558         | 2009            | 11                         |
| Haiti                     | HTBR61   | 3951         | 2012            | 9                          |
| Honduras                  | HNBR62   | 9583         | 2011            | 10                         |
| India                     | IABR52   | 39771        | 2005            | 11                         |
| Jordan                    | JOBR6C   | 6055         | 2012            | 9                          |
| Kazakhstan                | KKBR42   | 560          | 1999            | 5                          |
| Kenya                     | KEBR70   | 17997        | 2014            | 10                         |
| Kyrgyz Republic           | KYBR61   | 3841         | 2012            | 11                         |
| Lesotho                   | LSBR71   | 1252         | 2014            | 11                         |
| Liberia                   | LBRR6A   | 3132         | 2013            | 10                         |
| Madagascar                | MDBR51   | 5121         | 2008            | 10                         |
| Malawi                    | MWBR7H   | 5071         | 2015            | 11                         |
| Maldives                  | MVBR52   | 2342         | 2009            | 10                         |
| Mali                      | MLBR6H   | 4400         | 2012            | 11                         |
| Moldova                   | MBBR53   | 1276         | 2005            | 9                          |
| Morocco                   | MABR43   | 5400         | 2003            | 8                          |
| Mozambique                | MZBR62   | 9363         | 2011            | 10                         |
| Myanmar                   | MMBR71   | 4074         | 2015            | 11                         |
| Namibia                   | NMBR61   | 1766         | 2013            | 10                         |
| Nicaragua                 | NPBR60   | 2226         | 2011            | 10                         |
| Niger                     | NCBR41   | 5836         | 2001            | 11                         |
| Nigeria                   | NIBR61   | 4819         | 2012            | 10                         |
| Nepal                     | NGBR6A   | 24603        | 2013            | 11                         |
| Pakistan                  | PKBR61   | 3048         | 2012            | 11                         |
| Paraguay                  | PYBR21   | 3617         | 1990            | 9                          |
| Peru                      | PEBR61   | 8751         | 2012            | 9                          |
| Rwanda                    | RWBR70   | 3509         | 2014            | 11                         |
| Sao Tome and Principe     | STBR50   | 1567         | 2008            | 9                          |
| Senegal                   | SNBR7H   | 6048         | 2015            | 11                         |
| Sierra Leone              | SLBR61   | 4186         | 2013            | 11                         |
| Sri Lanka*                | LKBR02   | 2012         | 1987            | 7                          |
| Swaziland                 | SZBR51   | 1997         | 2006            | 11                         |
| Tajikistan                | TJBR61   | 4471         | 2012            | 11                         |
| Tanzania                  | TZBR7A   | 8516         | 2015            | 11                         |
| Thailand*                 | THBR01   | 1854         | 1987            | 7                          |
| Timor-Leste               | TLBR61   | 7672         | 2009            | 11                         |
| Togo                      | TGBR61   | 3124         | 2013            | 11                         |
| Trinidad and Tobago*      | TTBR01   | 842          | 1987            | 7                          |
| Tunisia*                  | TNBR02   | 2039         | 1988            | 6                          |
| Turkey                    | TRBR4A   | 3909         | 2003            | 7                          |
| Uganda                    | UGBR60   | 2044         | 2011            | 10                         |
| Uzbekistan*               | UZBR31   | 1024         | 1996            | 9                          |
| Yemen                     | YEBR61   | 13524        | 2013            | 11                         |
| Zambia                    | ZMBR61   | 11219        | 2013            | 11                         |
| Zimbabwe                  | ZWBR71   | 4743         | 2015            | 11                         |

DHS codes are unique identifiers of DHS surveys downloadable from <https://dhsprogram.com>. Countries marked with an asterisk only included children up to the age of three years in anthropometric measurement module.

Table S3: Prevalence of stunting and severe stunting as percentage by age and SES

| Age in months | Stunting prevalence in percent (95%-CI in brackets) |                  |                  | Severe stunting prevalence in percent (95%-CI in brackets) |                  |                  |
|---------------|-----------------------------------------------------|------------------|------------------|------------------------------------------------------------|------------------|------------------|
|               | Full sample                                         | Poorest quartile | Richest quartile | Full sample                                                | Poorest quartile | Richest quartile |
| 0             | 17.8 [16.4;19.3]                                    | 18.8 [16.3;21.4] | 16.5 [13.4;19.6] | 8.5 [7.5;9.6]                                              | 8.5 [6.7;10.4]   | 7.4 [5.2;9.7]    |
| 1             | 17.5 [16.6;18.5]                                    | 18.8 [17.1;20.5] | 17.5 [15.4;19.5] | 7.4 [6.8;8.1]                                              | 7.6 [6.4;8.7]    | 6.1 [4.8;7.3]    |
| 2             | 17.6 [16.7;18.5]                                    | 19.3 [17.7;21.0] | 12.9 [11.2;14.6] | 8.2 [7.5;8.8]                                              | 8.8 [7.6;10.0]   | 6.0 [4.8;7.2]    |
| 3             | 16.1 [15.2;16.9]                                    | 19.7 [18.1;21.3] | 12.9 [11.2;14.5] | 7.5 [6.9;8.1]                                              | 8.9 [7.7;10.0]   | 6.7 [5.4;7.9]    |
| 4             | 16.5 [15.6;17.4]                                    | 19.0 [17.4;20.6] | 12.2 [10.5;13.8] | 7.8 [7.2;8.4]                                              | 8.8 [7.7;10.0]   | 5.6 [4.4;6.7]    |
| 5             | 17.2 [16.3;18.0]                                    | 20.0 [18.3;21.6] | 12.7 [11.0;14.3] | 7.0 [6.4;7.5]                                              | 8.0 [6.9;9.1]    | 5.2 [4.1;6.3]    |
| 6             | 17.4 [16.5;18.2]                                    | 22.0 [20.3;23.7] | 12.1 [10.5;13.6] | 7.2 [6.7;7.8]                                              | 9.8 [8.6;11.0]   | 5.0 [3.9;6.0]    |
| 7             | 18.2 [17.3;19.1]                                    | 21.9 [20.2;23.6] | 12.1 [10.5;13.6] | 7.8 [7.1;8.4]                                              | 9.8 [8.5;11.0]   | 5.6 [4.5;6.7]    |
| 8             | 19.4 [18.5;20.3]                                    | 24.7 [22.9;26.6] | 14.4 [12.7;16.0] | 8.2 [7.5;8.8]                                              | 10.8 [9.5;12.2]  | 6.5 [5.4;7.7]    |
| 9             | 20.3 [19.4;21.2]                                    | 26.1 [24.3;27.9] | 12.7 [11.0;14.3] | 8.4 [7.8;9.1]                                              | 11.8 [10.4;13.1] | 5.3 [4.2;6.4]    |
| 10            | 23.1 [22.1;24.1]                                    | 28.3 [26.4;30.3] | 16.0 [14.2;17.8] | 9.4 [8.7;10.1]                                             | 12.0 [10.7;13.4] | 7.1 [5.8;8.4]    |
| 11            | 24.5 [23.5;25.6]                                    | 31.3 [29.3;33.4] | 15.8 [14.0;17.6] | 10.2 [9.5;10.9]                                            | 13.6 [12.1;15.1] | 6.6 [5.4;7.9]    |
| 12            | 25.1 [24.1;26.1]                                    | 31.0 [29.1;32.9] | 18.7 [16.7;20.6] | 10.0 [9.3;10.7]                                            | 12.6 [11.2;13.9] | 6.9 [5.5;8.2]    |
| 13            | 28.0 [27.0;29.1]                                    | 32.7 [30.8;34.7] | 20.5 [18.5;22.5] | 11.4 [10.6;12.1]                                           | 13.5 [12.1;14.9] | 7.7 [6.4;9.0]    |
| 14            | 29.7 [28.6;30.7]                                    | 37.1 [35.2;39.0] | 19.6 [17.7;21.6] | 11.7 [11.0;12.4]                                           | 16.9 [15.4;18.3] | 6.5 [5.3;7.6]    |
| 15            | 32.6 [31.5;33.7]                                    | 39.1 [37.2;41.1] | 22.3 [20.2;24.3] | 14.2 [13.4;15.0]                                           | 18.5 [16.9;20.1] | 7.8 [6.5;9.1]    |
| 16            | 33.7 [32.6;34.8]                                    | 40.8 [38.7;42.8] | 23.9 [21.8;26.0] | 14.5 [13.7;15.3]                                           | 19.1 [17.5;20.7] | 8.4 [7.0;9.8]    |
| 17            | 35.6 [34.5;36.8]                                    | 41.5 [39.4;43.5] | 25.0 [22.8;27.2] | 15.4 [14.6;16.3]                                           | 19.6 [18.0;21.3] | 9.6 [8.1;11.0]   |
| 18            | 36.9 [35.7;38.0]                                    | 46.0 [43.9;48.1] | 25.0 [22.9;27.1] | 16.3 [15.5;17.2]                                           | 22.5 [20.8;24.3] | 9.1 [7.7;10.5]   |
| 19            | 37.5 [36.3;38.6]                                    | 46.3 [44.1;48.5] | 26.9 [24.6;29.1] | 17.5 [16.6;18.4]                                           | 23.3 [21.5;25.2] | 11.3 [9.7;12.9]  |
| 20            | 40.7 [39.5;41.8]                                    | 50.3 [48.2;52.4] | 29.2 [26.8;31.5] | 18.7 [17.7;19.6]                                           | 25.0 [23.1;26.9] | 11.8 [10.1;13.4] |
| 21            | 40.4 [39.2;41.6]                                    | 47.6 [45.3;49.8] | 28.1 [25.8;30.4] | 18.2 [17.3;19.2]                                           | 23.4 [21.6;25.3] | 10.7 [9.1;12.3]  |
| 22            | 41.4 [40.2;42.6]                                    | 49.8 [47.6;52.0] | 28.2 [25.9;30.5] | 18.8 [17.8;19.8]                                           | 25.7 [23.8;27.7] | 11.6 [9.9;13.2]  |
| 23            | 40.4 [39.2;41.6]                                    | 49.8 [47.6;52.0] | 27.0 [24.8;29.3] | 17.9 [17.0;18.9]                                           | 23.6 [21.7;25.5] | 9.9 [8.4;11.4]   |
| 24            | 38.9 [37.7;40.0]                                    | 48.3 [46.2;50.4] | 27.9 [25.6;30.2] | 17.5 [16.6;18.4]                                           | 24.2 [22.4;26.0] | 11.1 [9.5;12.7]  |
| 25            | 38.5 [37.4;39.6]                                    | 46.9 [44.9;49.0] | 24.6 [22.6;26.7] | 16.8 [15.9;17.7]                                           | 21.6 [19.9;23.3] | 8.8 [7.4;10.1]   |
| 26            | 39.1 [37.9;40.2]                                    | 47.5 [45.4;49.7] | 26.0 [23.8;28.1] | 17.6 [16.7;18.5]                                           | 23.1 [21.3;24.9] | 9.7 [8.2;11.1]   |
| 27            | 40.0 [38.8;41.1]                                    | 47.1 [45.0;49.2] | 28.4 [26.1;30.6] | 18.1 [17.2;19.0]                                           | 24.3 [22.5;26.1] | 11.2 [9.6;12.8]  |
| 28            | 40.2 [39.1;41.4]                                    | 49.4 [47.3;51.6] | 27.7 [25.5;29.9] | 18.2 [17.3;19.1]                                           | 23.9 [22.1;25.7] | 9.8 [8.4;11.2]   |
| 29            | 39.2 [38.0;40.3]                                    | 48.3 [46.2;50.4] | 25.9 [23.6;28.1] | 18.1 [17.2;19.0]                                           | 24.7 [22.8;26.5] | 10.5 [8.9;12.0]  |
| 30            | 40.0 [38.8;41.2]                                    | 48.2 [46.1;50.4] | 28.1 [25.9;30.4] | 17.7 [16.8;18.6]                                           | 23.7 [21.9;25.5] | 10.6 [9.0;12.1]  |
| 31            | 40.8 [39.6;42.0]                                    | 48.0 [45.8;50.1] | 26.7 [24.4;28.9] | 19.2 [18.3;20.2]                                           | 23.9 [22.1;25.8] | 10.9 [9.3;12.5]  |
| 32            | 39.5 [38.3;40.7]                                    | 48.7 [46.5;50.9] | 24.6 [22.4;26.8] | 18.4 [17.4;19.3]                                           | 24.7 [22.8;26.6] | 9.2 [7.7;10.6]   |
| 33            | 41.0 [39.7;42.2]                                    | 51.0 [48.7;53.2] | 25.4 [23.2;27.6] | 19.5 [18.5;20.5]                                           | 26.3 [24.4;28.3] | 11.0 [9.4;12.6]  |
| 34            | 40.5 [39.3;41.7]                                    | 48.7 [46.5;51.0] | 26.1 [23.8;28.3] | 19.2 [18.2;20.2]                                           | 25.7 [23.7;27.7] | 10.1 [8.5;11.6]  |
| 35            | 40.1 [38.9;41.3]                                    | 50.9 [48.6;53.1] | 25.2 [23.0;27.4] | 18.9 [18.0;19.9]                                           | 26.4 [24.3;28.4] | 10.2 [8.7;11.8]  |
| 36            | 38.3 [37.1;39.5]                                    | 47.6 [45.4;49.8] | 24.9 [22.7;27.1] | 16.6 [15.7;17.5]                                           | 23.7 [21.8;25.5] | 9.1 [7.6;10.6]   |
| 37            | 38.0 [36.9;39.1]                                    | 46.2 [44.1;48.2] | 24.2 [22.1;26.3] | 15.9 [15.0;16.7]                                           | 20.9 [19.2;22.6] | 7.8 [6.5;9.1]    |
| 38            | 37.6 [36.4;38.8]                                    | 45.0 [42.9;47.2] | 23.3 [21.0;25.5] | 16.1 [15.2;17.0]                                           | 21.4 [19.6;23.1] | 6.9 [5.6;8.2]    |
| 39            | 39.1 [38.0;40.3]                                    | 48.7 [46.7;50.8] | 25.2 [23.0;27.4] | 16.4 [15.5;17.2]                                           | 22.7 [21.0;24.5] | 9.0 [7.5;10.4]   |
| 40            | 38.3 [37.1;39.5]                                    | 45.9 [43.7;48.0] | 25.9 [23.6;28.1] | 16.8 [15.8;17.7]                                           | 21.0 [19.2;22.7] | 10.4 [8.8;11.9]  |
| 41            | 37.6 [36.5;38.8]                                    | 47.0 [44.8;49.2] | 23.9 [21.7;26.1] | 16.4 [15.5;17.3]                                           | 22.2 [20.4;24.1] | 8.6 [7.2;10.1]   |
| 42            | 38.1 [37.0;39.3]                                    | 46.4 [44.2;48.5] | 24.8 [22.6;27.0] | 16.2 [15.3;17.1]                                           | 22.2 [20.4;24.0] | 8.4 [6.9;9.8]    |
| 43            | 39.4 [38.2;40.6]                                    | 48.0 [45.9;50.2] | 26.1 [23.8;28.4] | 17.5 [16.6;18.5]                                           | 23.1 [21.3;24.9] | 9.3 [7.8;10.8]   |
| 44            | 38.9 [37.6;40.1]                                    | 48.1 [45.9;50.4] | 23.3 [21.0;25.5] | 17.9 [17.0;18.9]                                           | 24.3 [22.4;26.3] | 8.0 [6.6;9.5]    |
| 45            | 39.1 [37.9;40.3]                                    | 46.6 [44.4;48.9] | 24.6 [22.3;26.9] | 18.1 [17.1;19.1]                                           | 23.3 [21.4;25.2] | 9.3 [7.8;10.9]   |
| 46            | 37.8 [36.6;39.0]                                    | 47.0 [44.7;49.3] | 24.7 [22.4;27.0] | 16.9 [15.9;17.8]                                           | 22.5 [20.6;24.4] | 8.9 [7.4;10.4]   |
| 47            | 37.6 [36.4;38.8]                                    | 45.8 [43.5;48.1] | 24.1 [21.9;26.4] | 16.6 [15.7;17.5]                                           | 21.6 [19.7;23.5] | 9.9 [8.3;11.5]   |
| 48            | 35.0 [33.8;36.2]                                    | 44.0 [41.8;46.2] | 21.2 [19.1;23.3] | 15.4 [14.5;16.3]                                           | 21.0 [19.2;22.9] | 7.9 [6.5;9.2]    |
| 49            | 32.7 [31.5;33.8]                                    | 40.7 [38.6;42.8] | 19.5 [17.5;21.6] | 13.2 [12.3;14.0]                                           | 18.0 [16.4;19.7] | 6.8 [5.5;8.1]    |
| 50            | 33.4 [32.3;34.6]                                    | 41.7 [39.5;43.8] | 20.8 [18.7;22.8] | 14.1 [13.3;15.0]                                           | 18.9 [17.2;20.6] | 7.4 [6.1;8.8]    |
| 51            | 35.2 [34.0;36.4]                                    | 44.1 [41.9;46.3] | 20.1 [18.0;22.2] | 14.2 [13.3;15.1]                                           | 19.6 [17.8;21.4] | 6.7 [5.4;8.0]    |
| 52            | 33.2 [32.1;34.4]                                    | 42.1 [39.9;44.3] | 20.8 [18.6;23.0] | 14.3 [13.4;15.1]                                           | 19.9 [18.1;21.7] | 8.5 [7.0;9.9]    |
| 53            | 33.2 [32.1;34.4]                                    | 42.4 [40.2;44.6] | 20.8 [18.7;22.9] | 14.1 [13.3;15.0]                                           | 19.6 [17.9;21.4] | 7.4 [6.1;8.8]    |
| 54            | 33.6 [32.4;34.8]                                    | 43.6 [41.4;45.9] | 20.2 [18.1;22.3] | 13.7 [12.8;14.5]                                           | 19.2 [17.4;21.0] | 7.0 [5.7;8.3]    |
| 55            | 34.4 [33.2;35.6]                                    | 43.5 [41.2;45.7] | 21.1 [18.9;23.3] | 13.9 [13.0;14.7]                                           | 19.1 [17.3;20.9] | 7.5 [6.1;8.9]    |
| 56            | 34.6 [33.4;35.8]                                    | 42.8 [40.5;45.1] | 20.3 [18.1;22.5] | 14.6 [13.7;15.5]                                           | 18.8 [17.0;20.6] | 8.1 [6.6;9.5]    |
| 57            | 34.0 [32.8;35.2]                                    | 44.3 [42.0;46.6] | 19.7 [17.6;21.8] | 14.3 [13.4;15.2]                                           | 19.3 [17.5;21.2] | 7.0 [5.6;8.3]    |
| 58            | 33.6 [32.4;34.8]                                    | 41.8 [39.5;44.1] | 20.2 [18.0;22.4] | 14.3 [13.4;15.2]                                           | 20.0 [18.1;21.8] | 6.2 [4.9;7.5]    |
| 59            | 35.9 [34.2;37.6]                                    | 45.7 [42.6;48.9] | 20.3 [17.2;23.4] | 15.0 [13.8;16.3]                                           | 20.0 [17.5;22.5] | 5.4 [3.7;7.1]    |

Figure S1: Prevalence of stunting and severe stunting as percentage – using population weights

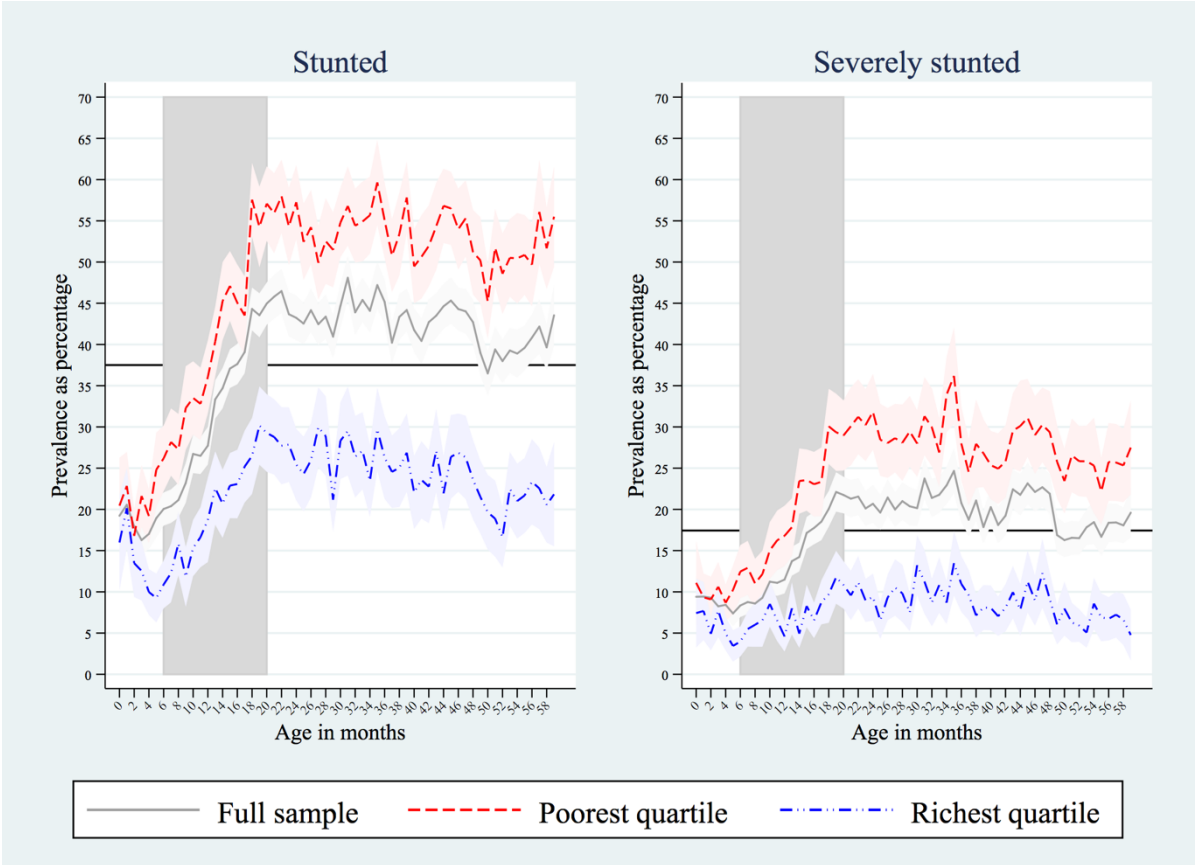

Light bands indicate 95%-confidence intervals. Horizontal lines show grand means across age groups and wealth quartiles. Vertical bands highlight the age range six to 20 months.

Figure S2: Deviation of stunting rates from main analysis sample (no rounded age)

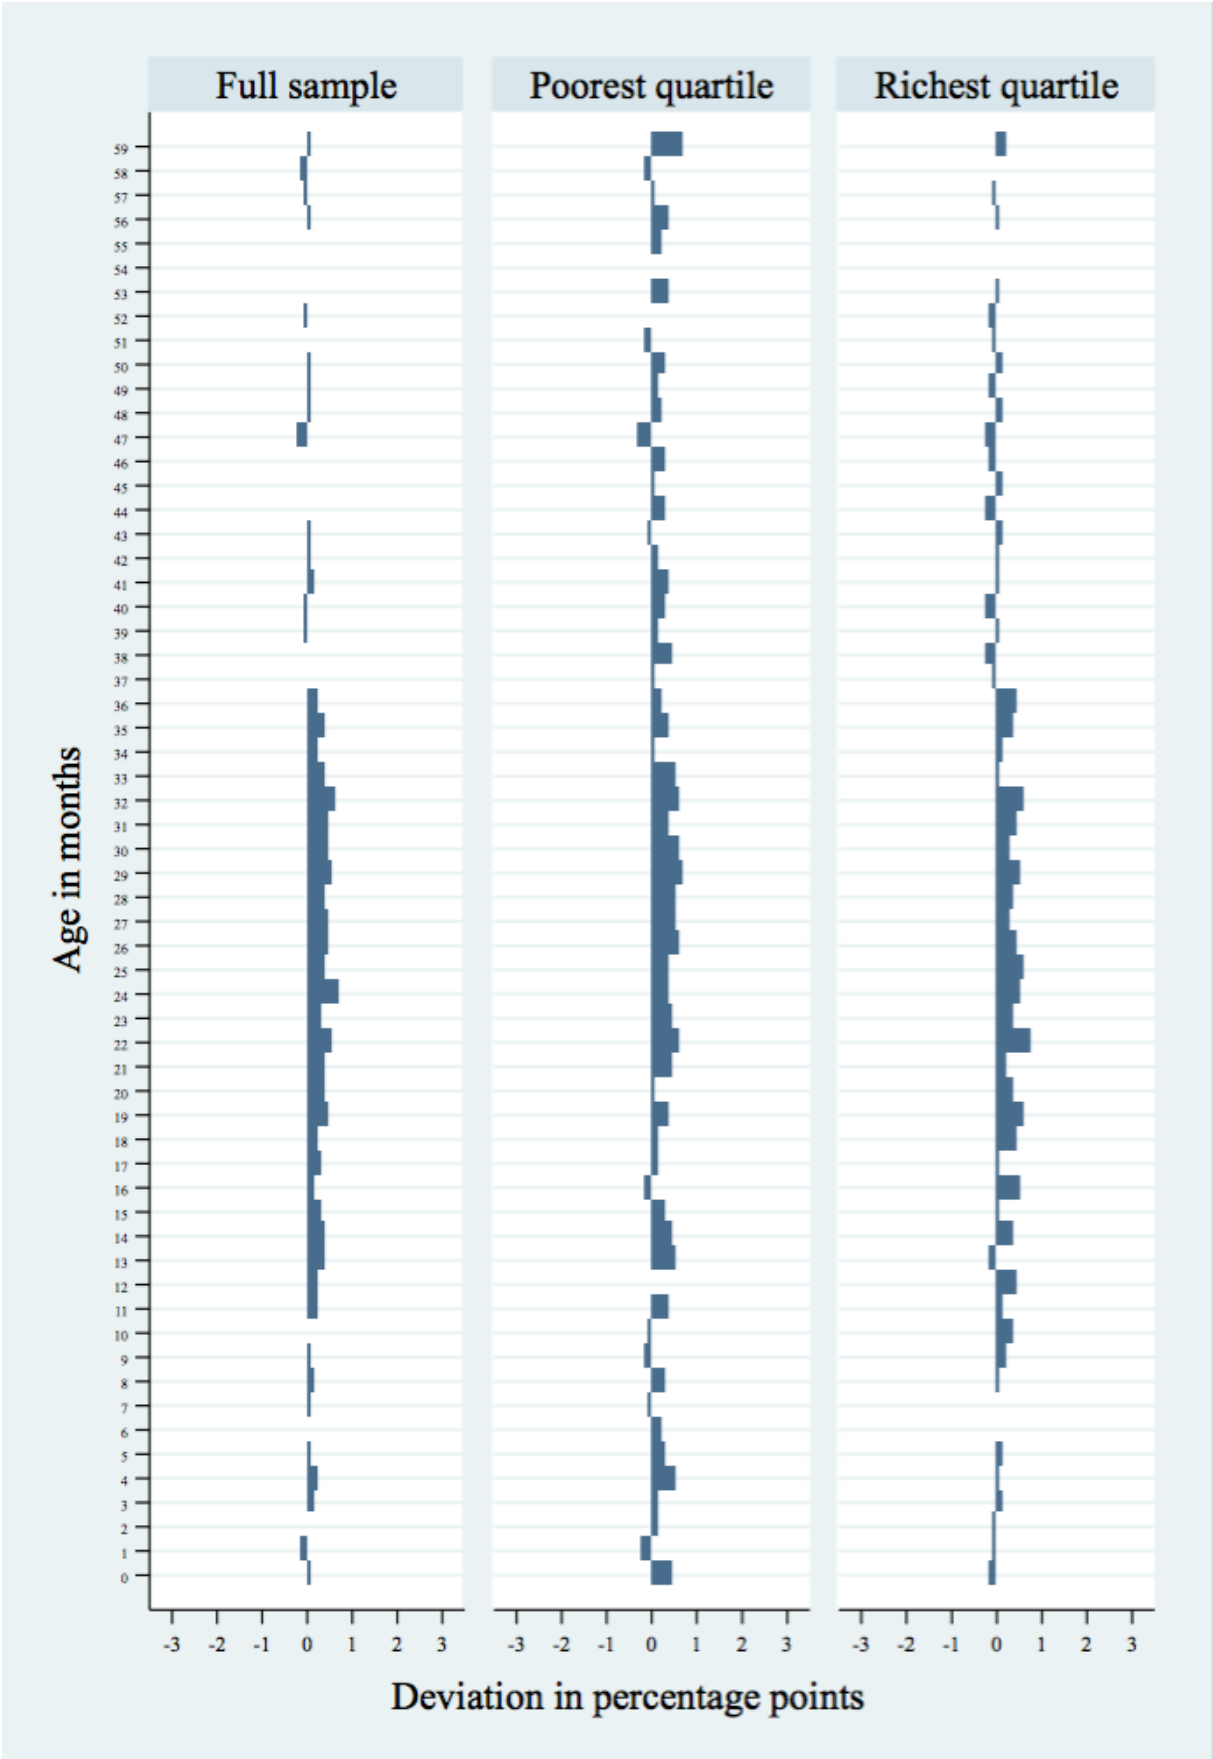

Figure S3: Deviation of stunting rates from main analysis sample (5%-cutoff for asset index)

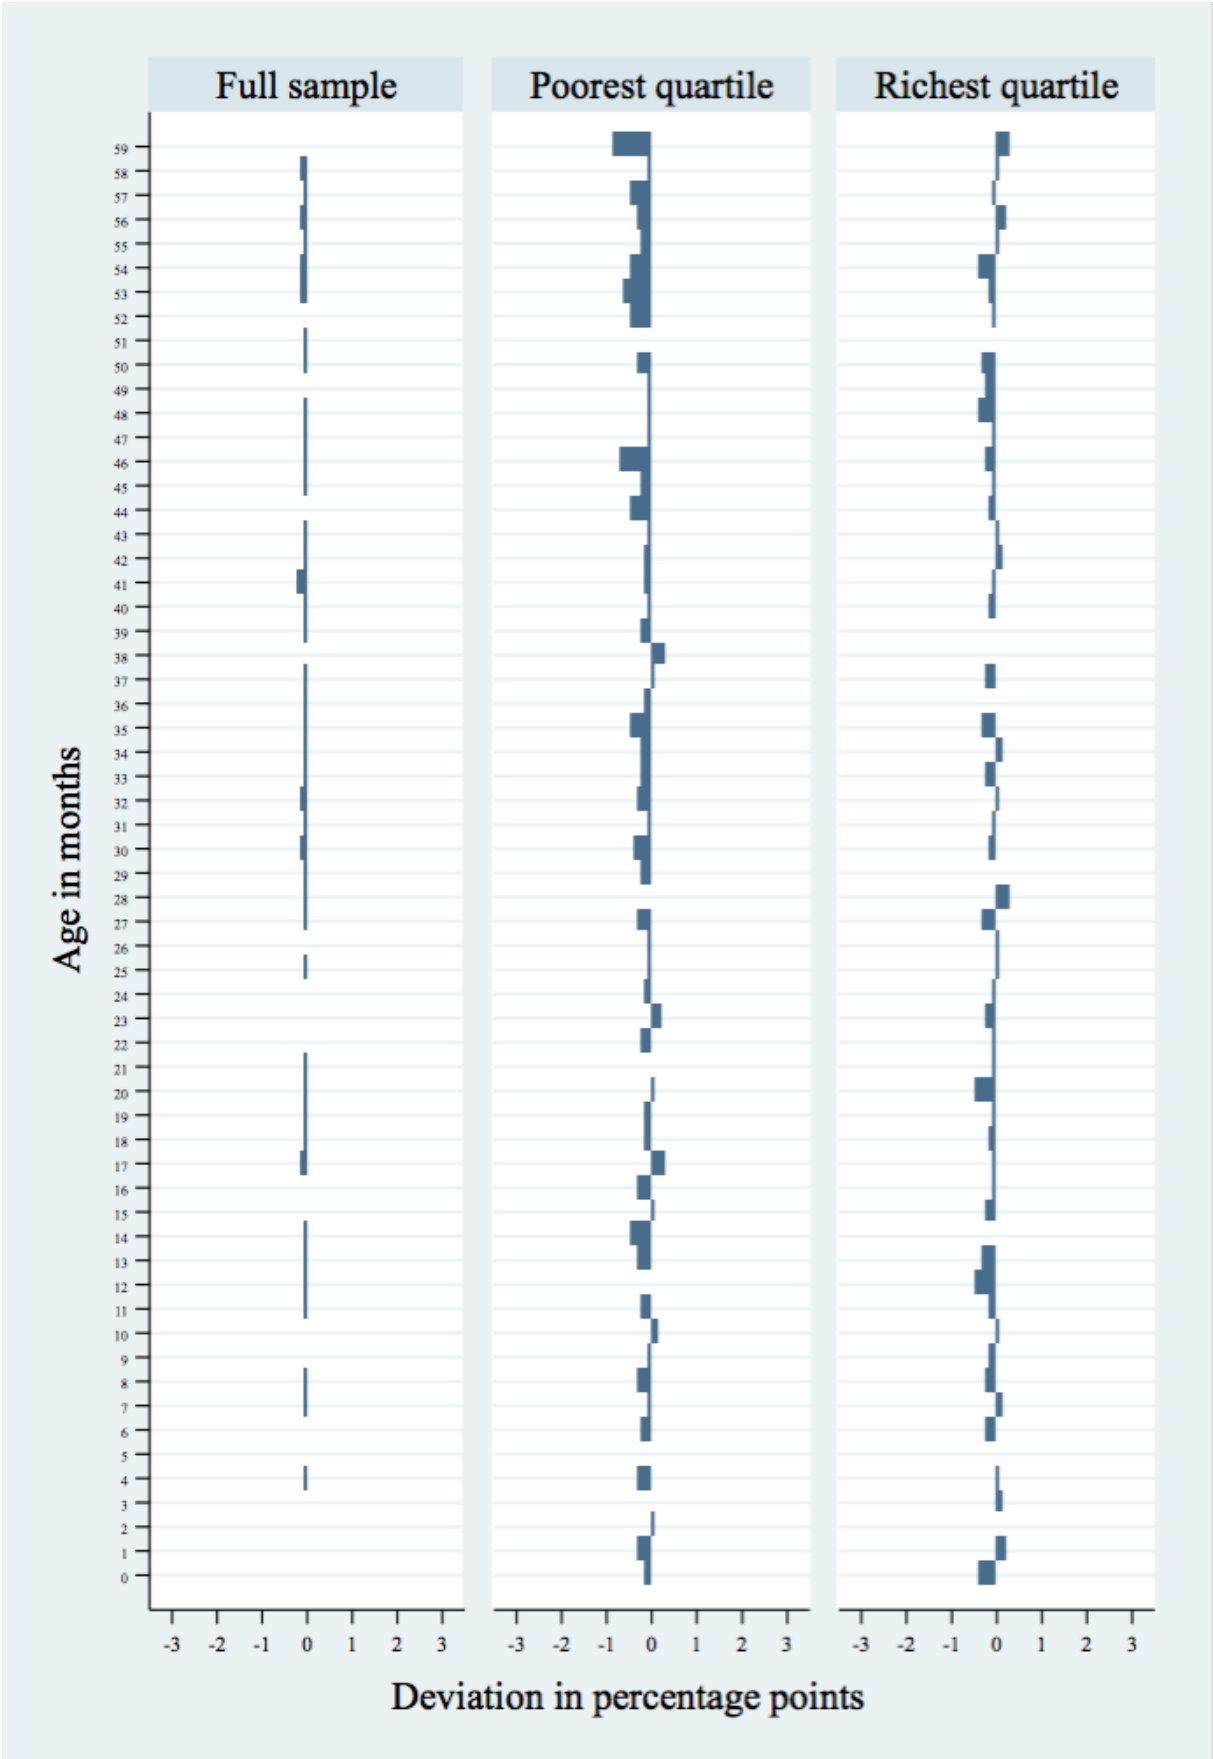

Figure S4: Prevalence of severe stunting by country income group

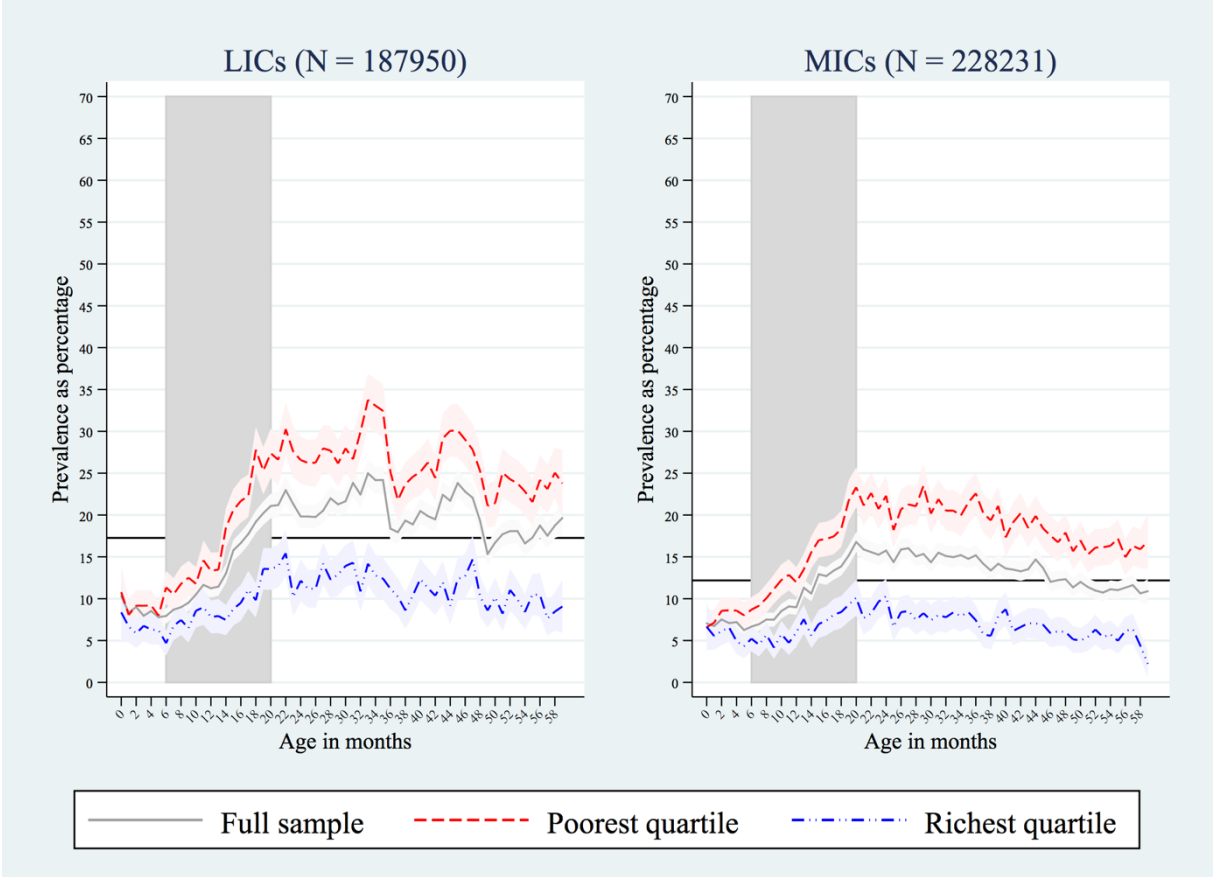

Light bands indicate 95%-confidence intervals. Horizontal lines show grand means across age groups and wealth quartiles. Vertical bands highlight the age range six to 20 months.



Figure S5: Prevalence of stunting by age group and household SES – Latin America and the Caribbean

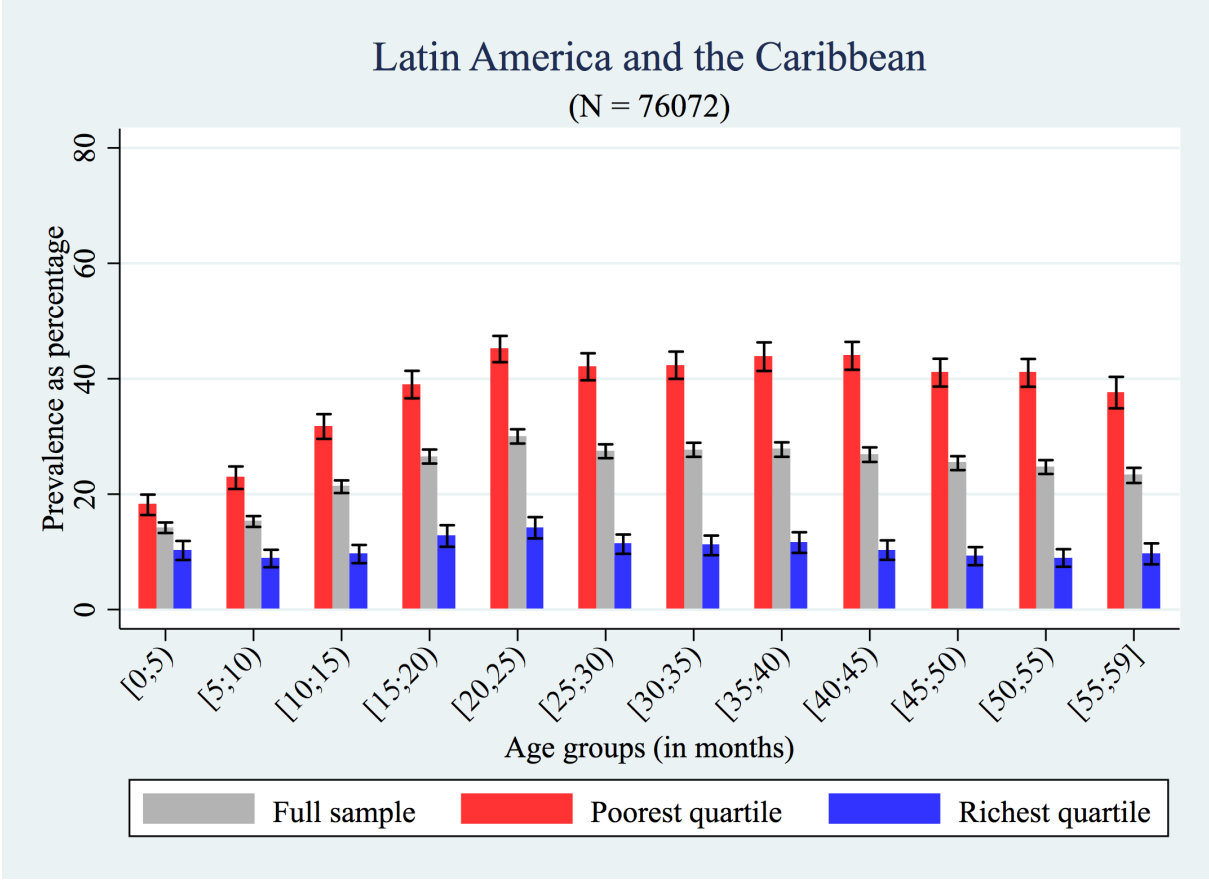

Stunting prevalence in percent. Black whiskers indicate 95% confidence intervals. Square brackets in age groups denote closed interval end-points and parentheses open interval end-points.

Figure S6: Prevalence of stunting by age group and household SES – Middle East and North Africa

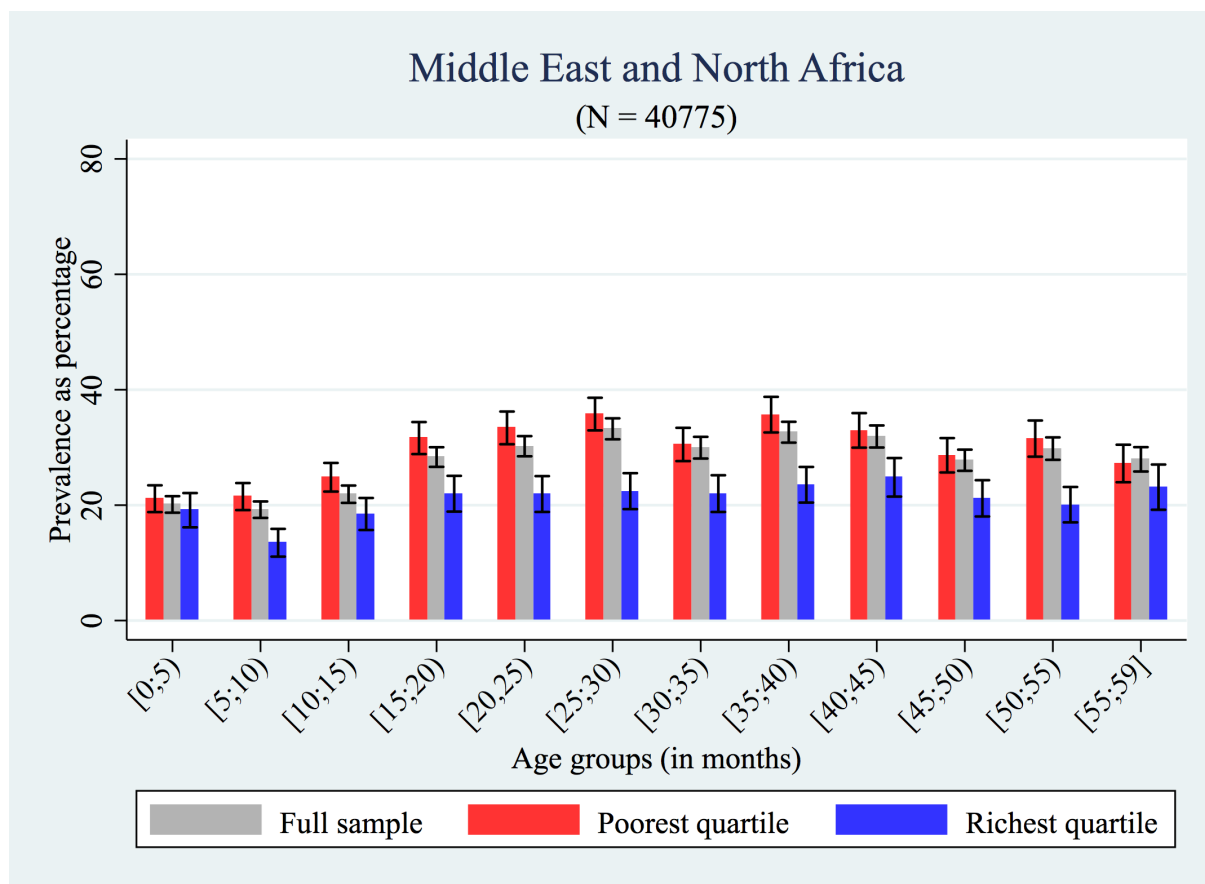

Stunting prevalence in percent. Black whiskers indicate 95% confidence intervals. Square brackets in age groups denote closed interval end-points and parentheses open interval end-points.

Figure S7: Prevalence of stunting by age group and household SES – Sub Saharan Africa

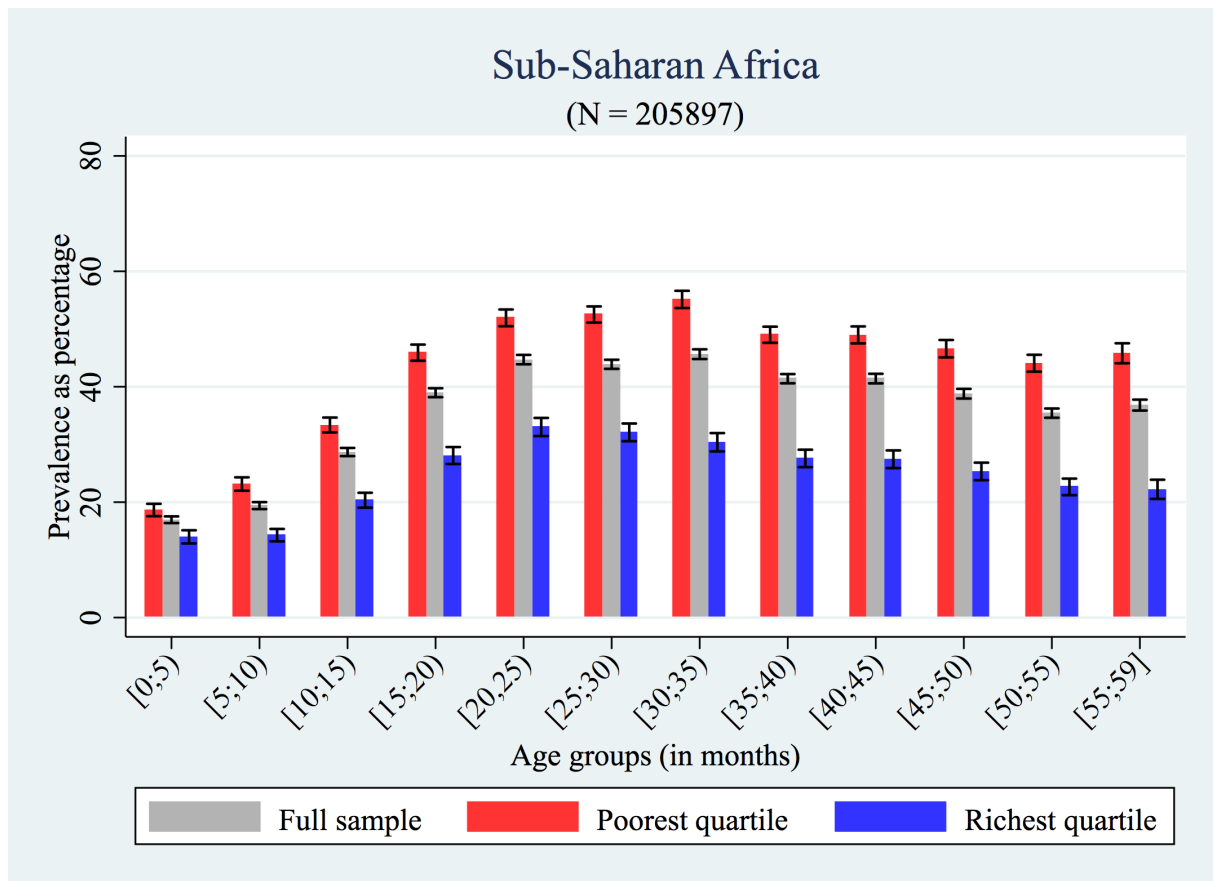

Stunting prevalence in percent. Black whiskers indicate 95% confidence intervals. Square brackets in age groups denote closed interval end-points and parentheses open interval end-points.

Figure S8: Prevalence of stunting by age group and household SES – South Asia

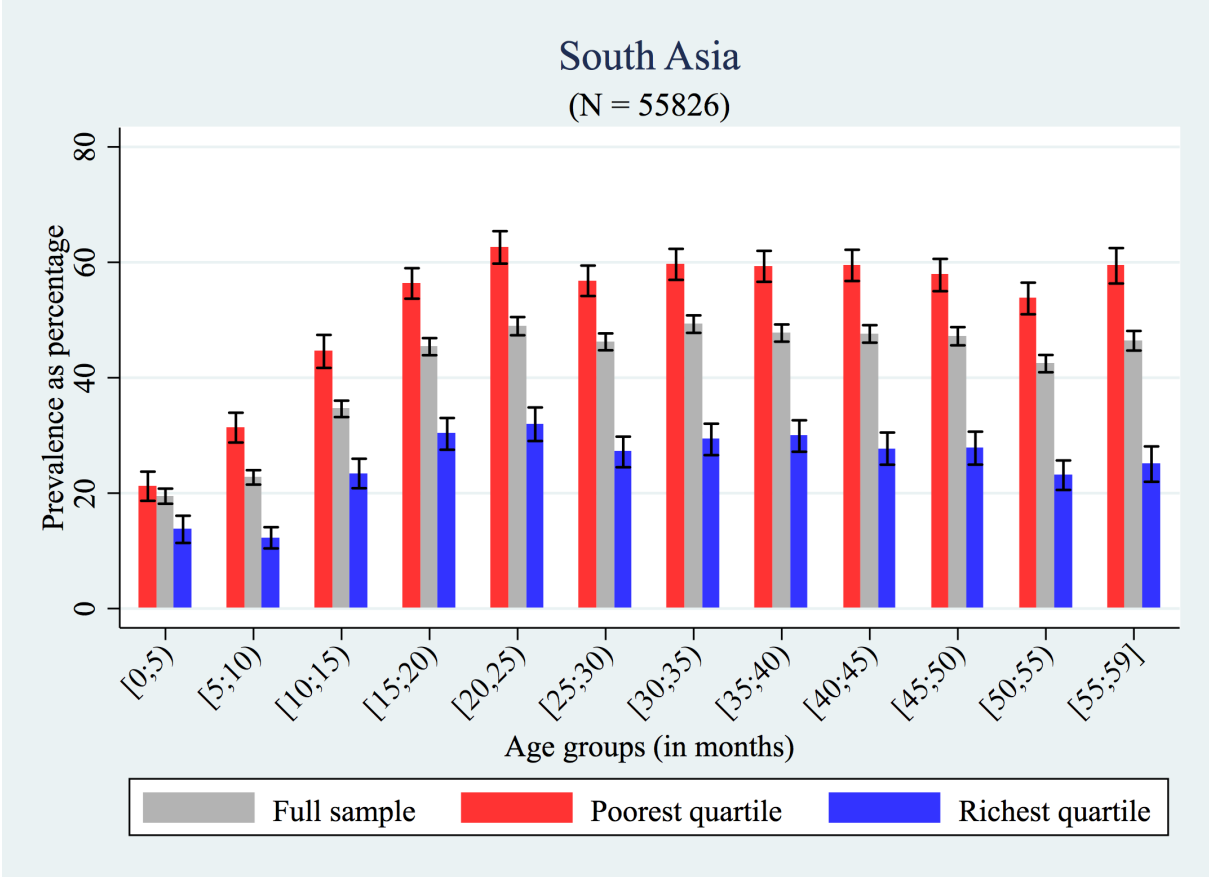

Stunting prevalence in percent. Black whiskers indicate 95% confidence intervals. Square brackets in age groups denote closed interval end-points and parentheses open interval end-points.

Figure S9: Prevalence of stunting by age group and household SES – Europe and Central Asia

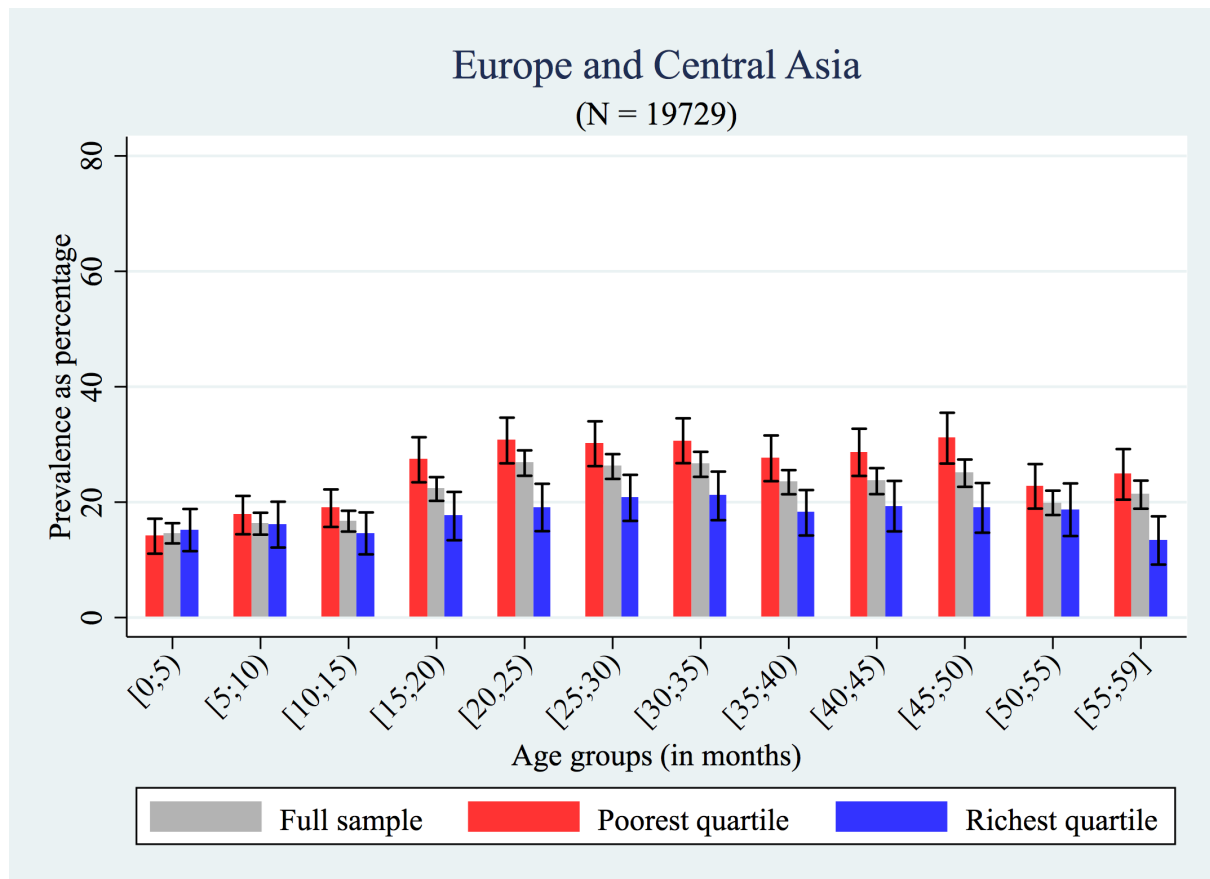

Stunting prevalence in percent. Black whiskers indicate 95% confidence intervals. Square brackets in age groups denote closed interval end-points and parentheses open interval end-points.

Figure S10: Prevalence of stunting by age group and household SES – East Asia and Pacific

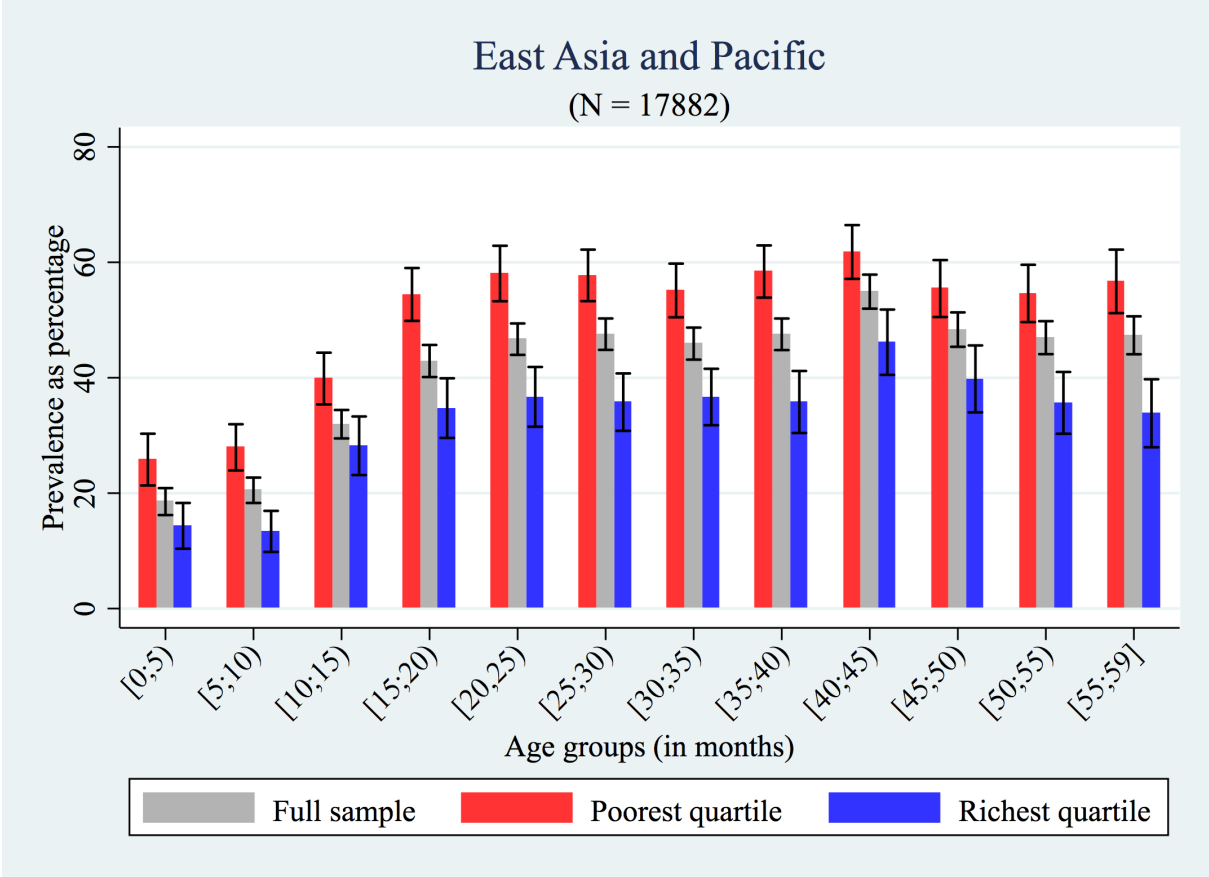

Stunting prevalence in percent. Black whiskers indicate 95% confidence intervals. Square brackets in age groups denote closed interval end-points and parentheses open interval end-points.

Table S4: Cross-tabulation of household SES quartiles and maternal education categories

| SES quartile             | Maternal education |                              |                            |                                |                              |                  | <i>All education categories</i> |
|--------------------------|--------------------|------------------------------|----------------------------|--------------------------------|------------------------------|------------------|---------------------------------|
|                          | No education       | Incomplete primary education | Complete primary education | Incomplete secondary education | Complete secondary education | Higher education |                                 |
| Poorest                  | 23 881             | 11 812                       | 4630                       | 4697                           | 1488                         | 422              | <i>46 930</i>                   |
| 2 <sup>nd</sup> poorest  | 17 300             | 9419                         | 5069                       | 6311                           | 1923                         | 880              | <i>40 902</i>                   |
| 2 <sup>nd</sup> richest  | 11 750             | 7904                         | 5409                       | 9561                           | 3809                         | 1891             | <i>40 324</i>                   |
| Richest                  | 6102               | 4812                         | 4037                       | 11 519                         | 6312                         | 6585             | <i>39 367</i>                   |
| <i>All SES quartiles</i> | <i>59 033</i>      | <i>33 947</i>                | <i>19 145</i>              | <i>32 088</i>                  | <i>13 532</i>                | <i>9778</i>      | <i>167 523</i>                  |

The table depicts the available number of observations for each cell in the regression sample. SES = socioeconomic status
